# Supplementary material for: Microcystin-Bound Protein Patterns in Different Cultures of Microcystis aeruginosa and Field Samples
Source: PubMed Central journal article supplement (PMC5086653; doi:10.3390/toxins8100293), 2016-10-12
Supplement: toxins-08-00293-s001.pdf [file toxins-08-00293-s001.pdf]

# Supplementary Materials: Microcystin-Bound Protein Patterns in Different Cultures of *Microcystis aeruginosa* and Field Samples

Nian Wei, Lili Hu, Lirong Song and Nanqin Gan

Table S1. Redox regulated proteins in *Synechocystis* sp. PCC6803.

| Protein Name                               | Accession Number <sup>a</sup> | ORF     | Trx Target <sup>b</sup> | Grx Target <sup>c</sup> | Glutathionylated Regulation <sup>d</sup> | Redox Sensitive <sup>e</sup> |
|--------------------------------------------|-------------------------------|---------|-------------------------|-------------------------|------------------------------------------|------------------------------|
| Phosphoribulokinase                        | P37101                        | sll1525 | Y [47]                  | Y [48]                  | Y [49]                                   | Y [46]                       |
| 60 kDa chaperonin 1                        | Q05972                        | slr2076 | Y [47]                  | Y [48]                  | Y [49]                                   | -                            |
| Phosphoglycerate kinase                    | P74421                        | slr0394 | Y [47]                  | Y [48]                  | Y [49]                                   | Y [54]                       |
| Fructose-bisphosphate aldolase, class 2    | Q55664                        | sll0018 | Y [47]                  | -                       | Y [49]                                   | Y [46]                       |
| ATP synthase subunit alpha                 | P27179                        | sll1326 | Y [47]                  | Y [48]                  | Y [49]                                   | Y [46]                       |
| Glyceraldehyde-3-phosphate dehydrogenase 1 | P49433                        | slr0884 | -                       | Y [48]                  | Y [49]                                   | Y [46]                       |

<sup>a</sup> Accession number in Uniprot database; <sup>b</sup> Protein identified as putative thioredoxin target in *Synechocystis* sp. PCC6803 [47]; <sup>c</sup> Protein identified as putative glutaredoxin target in *Synechocystis* sp. PCC6803 [48]; <sup>d</sup> Protein identified could be glutathionylated in *Synechocystis* sp. PCC6803 [49]; <sup>e</sup> Protein identified could be redox sensitive in *Synechocystis* sp. PCC6803 [46,54]. In the column, capital letter Y means the protein is under relative redox regulation in *Synechocystis* sp. PCC6803, and the reference is cited behind. The reference number is as listed as in the text.

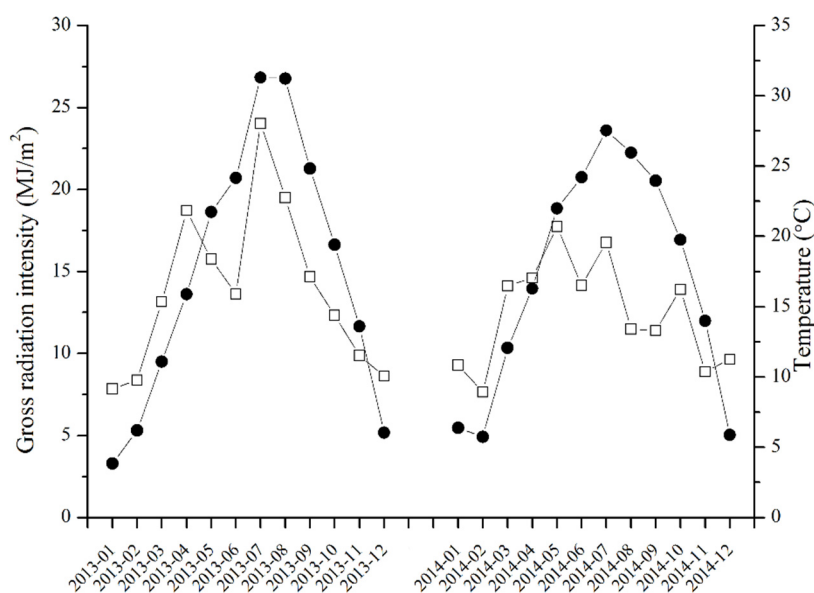

**Figure S1.** Average monthly level of gross radiation intensity (□) and temperature (●) of months from January 2013 to December 2014. Data were provided by Taihu Laboratory for Lake Ecosystem Research, Chinese Ecosystem Research Network (meteorological station site: 31.42° N, 120.21° E). The meteorological station site is near our sampling site (31.41° N, 120.19° E) in Meiliang bay.

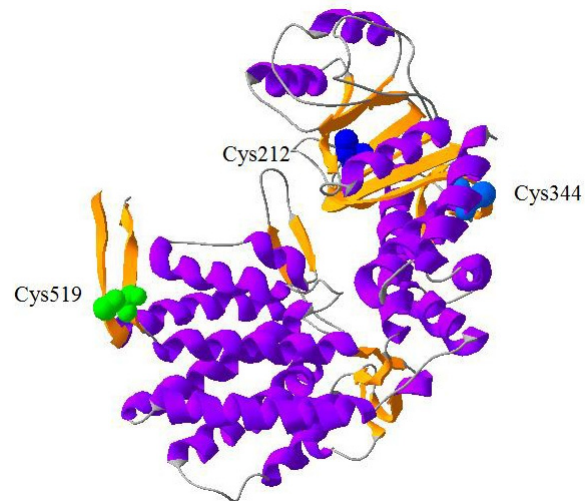

**Figure S2.** Predicted structure of *Microcystis aeruginosa* FACHB-905 GroEL. The structure of *Microcystis aeruginosa* FACHB-905 GroEL was obtained using SWISS-MODEL. The model is based on the known structure of GroEL from *Thermus thermophilus* (PDB: 4V4O). The image of the three-dimensional structure was generated with SWISS-PdbViewer. The solute accessibility of three cysteine residues of *Microcystis aeruginosa* FACHB-905 in the image is indicated by the color as computed by SWISS-PdbViewer. Colors range from dark blue for completely buried amino acids to red for residues with maximum surface exposure.
